Published by

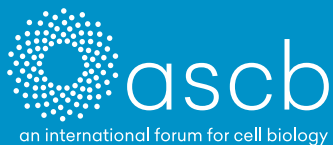

Editorial Partner

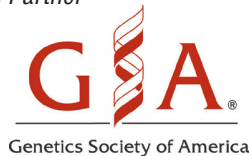

Volume 14, Spring 2015

CBE

# Life Sciences Education

[www.lifescied.org](http://www.lifescied.org)

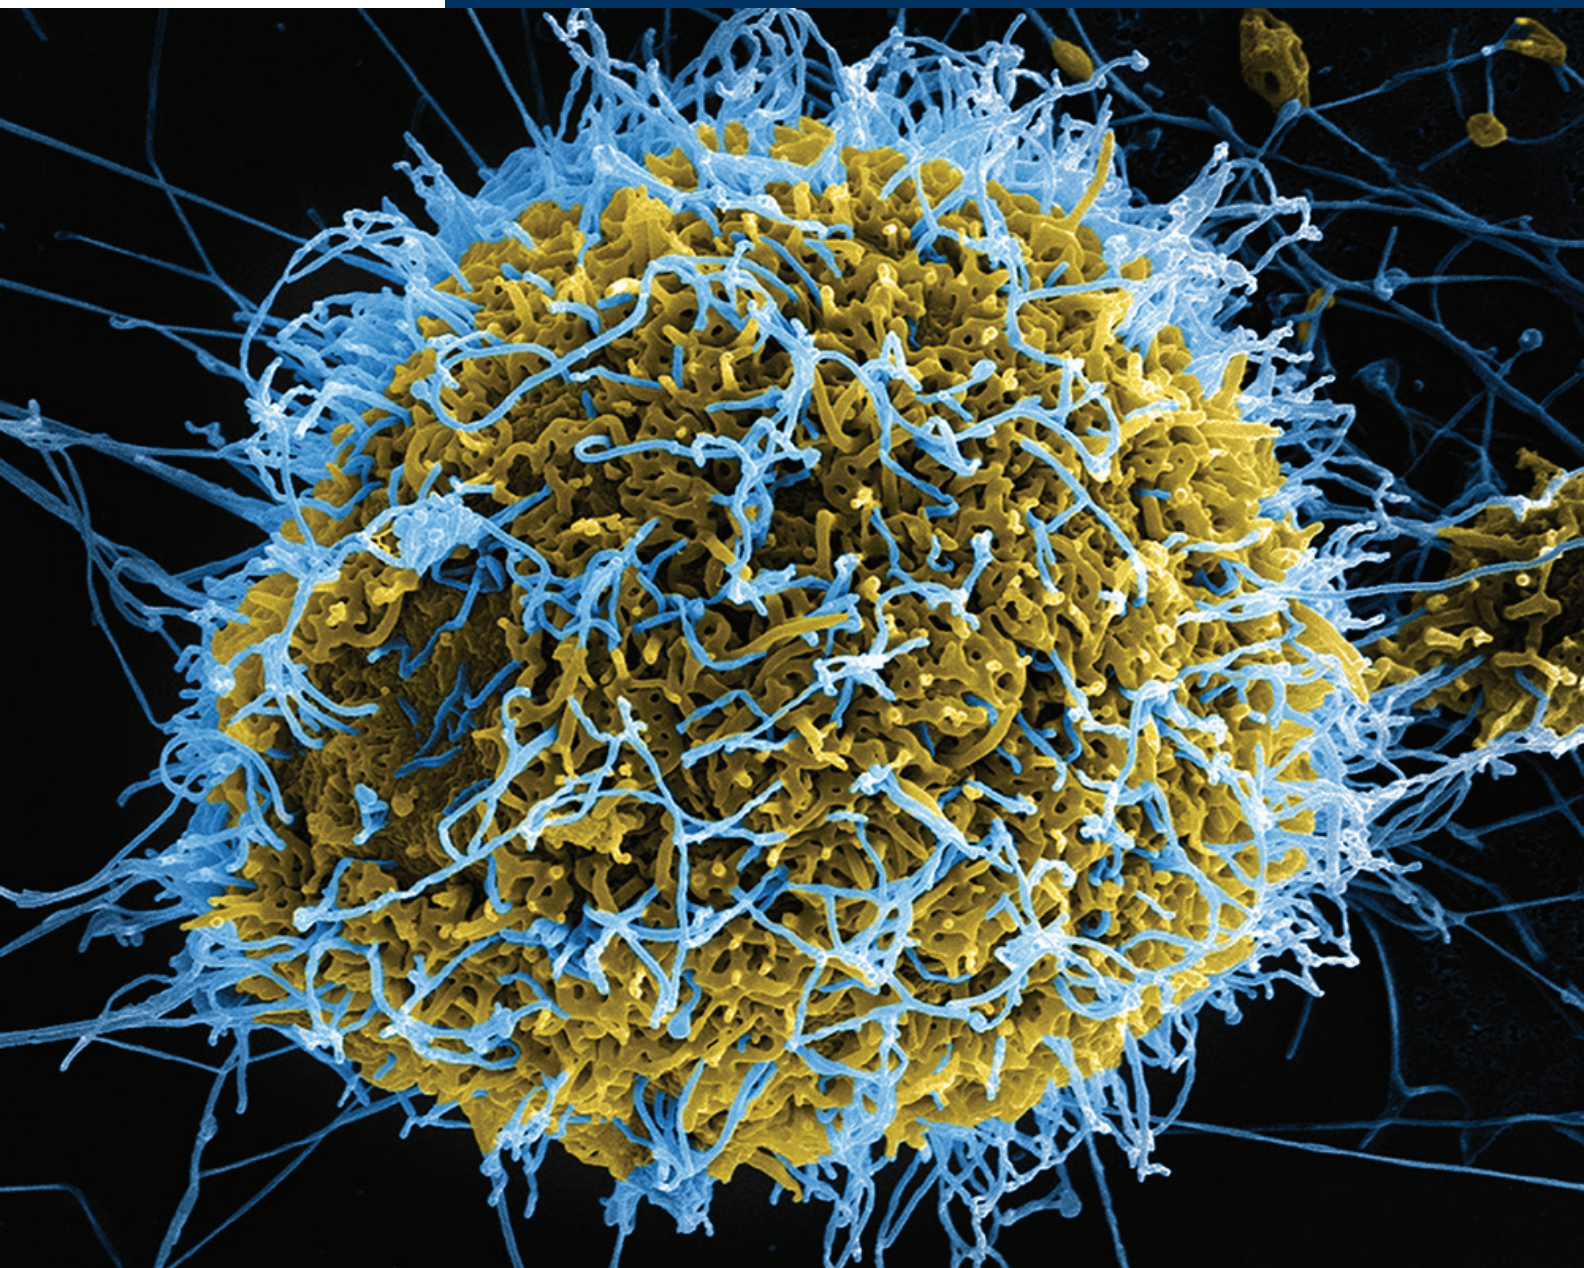

## Outbreaks and Infectious Disease
